# Supplementary material for: Unassisted photoelectrochemical hydrogen peroxide production over MoOx-supported Mo on a Cu3BiS3 photocathode
Source: Royal Society of Chemistry journal article supplement (doi:10.1039/d4ee00741g), 2024-01-01
Supplement: d4ee00741g1.pdf [file d4ee00741g1.pdf]

## Electronic Supplementary Information

### Unassisted Photoelectrochemical Hydrogen Peroxide Production over MoO<sub>x</sub>-Supported Mo on Cu<sub>3</sub>BiS<sub>3</sub> Photocathode

Subin Moon,<sup>1</sup> Young Sun Park,<sup>1</sup> Hyungsoo Lee,<sup>1</sup> Wooyong Jeong,<sup>1</sup> Eunji Kwon,<sup>2</sup> Jeongyoub Lee,<sup>1</sup> Juwon Yun,<sup>1</sup> Soobin Lee,<sup>1</sup> Jun Hwan Kim,<sup>1</sup> Seungho Yu,<sup>2</sup> and Jooho Moon\*<sup>1</sup>

<sup>1</sup> Department of Materials Science and Engineering, Yonsei University, Seoul 03722, Republic of Korea

<sup>2</sup> Energy Storage Research Center, Korea Institute of Science and Technology 5, Hwarang-ro- 14-gil, Seongbuk-gu, Seoul 02792, Republic of Korea

\* E-mail: jmoon@yonsei.ac.kr

**Keywords:** photoelectrochemical oxygen reduction reaction, strength of adsorbate adsorption, metal oxide supported catalyst, unassisted hydrogen peroxide production

## Supplementary Figures

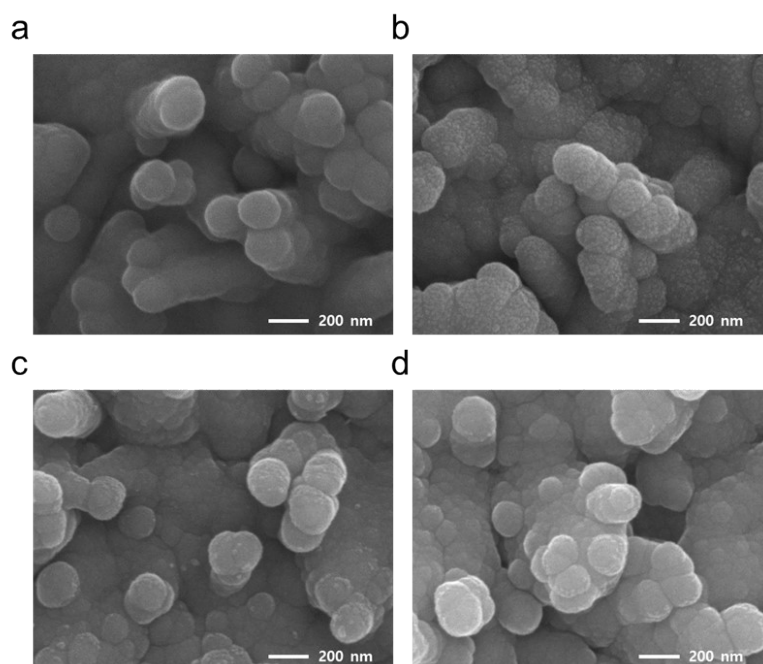

**Fig. S1** Top-view scanning electron microscopy image for a)  $\text{Cu}_3\text{BiS}_3/\text{CdS}/\text{TiO}_2$ , b)  $\text{Cu}_3\text{BiS}_3/\text{CdS}/\text{TiO}_2/\text{MoO}_x$ , c)  $\text{Cu}_3\text{BiS}_3/\text{CdS}/\text{TiO}_2/\text{MoO}_x/\text{Mo}$ , and d)  $\text{Cu}_3\text{BiS}_3/\text{CdS}/\text{TiO}_2/\text{Mo}$ .

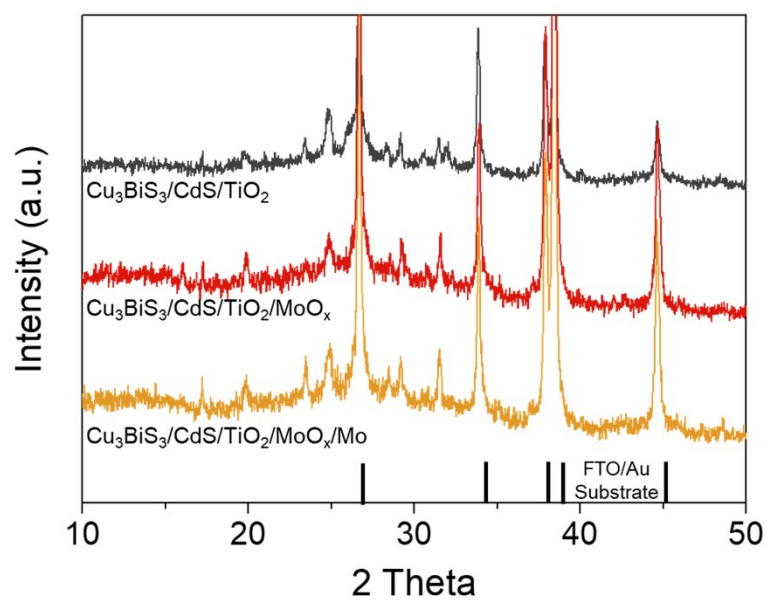

**Fig. S2** XRD patterns for  $\text{Cu}_3\text{BiS}_3/\text{CdS}/\text{TiO}_2$  (black) and after  $\text{MoO}_x$  deposition (red) followed by Mo deposition (yellow).

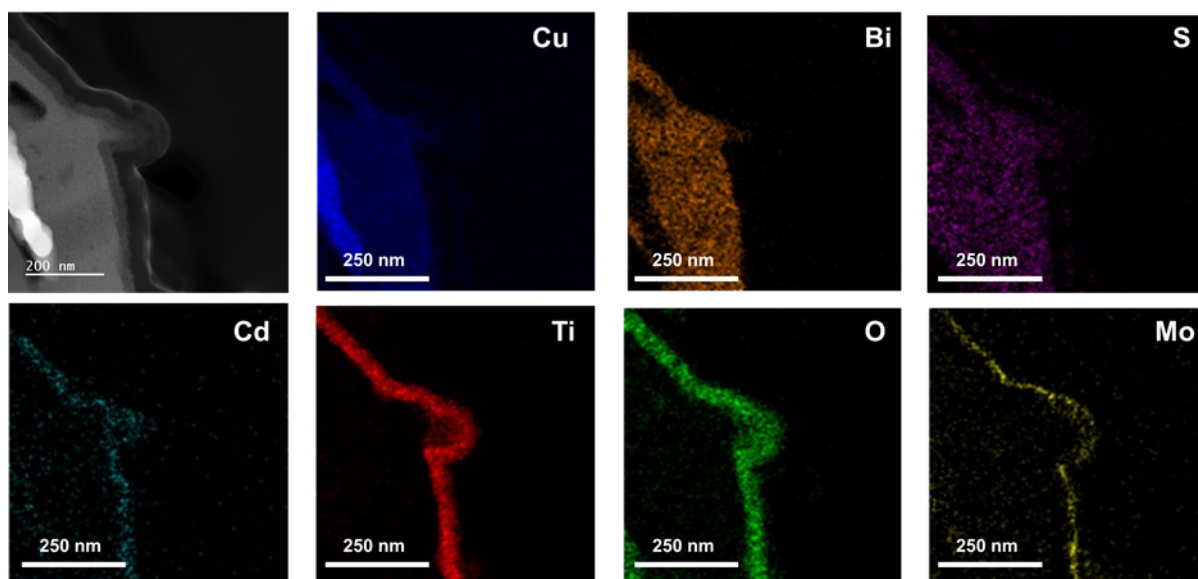

**Fig. S3** TEM image and corresponding EDS elemental mapping images at the low magnification for  $\text{Cu}_3\text{BiS}_3/\text{CdS}/\text{TiO}_2/\text{MoO}_x/\text{Mo}$ .

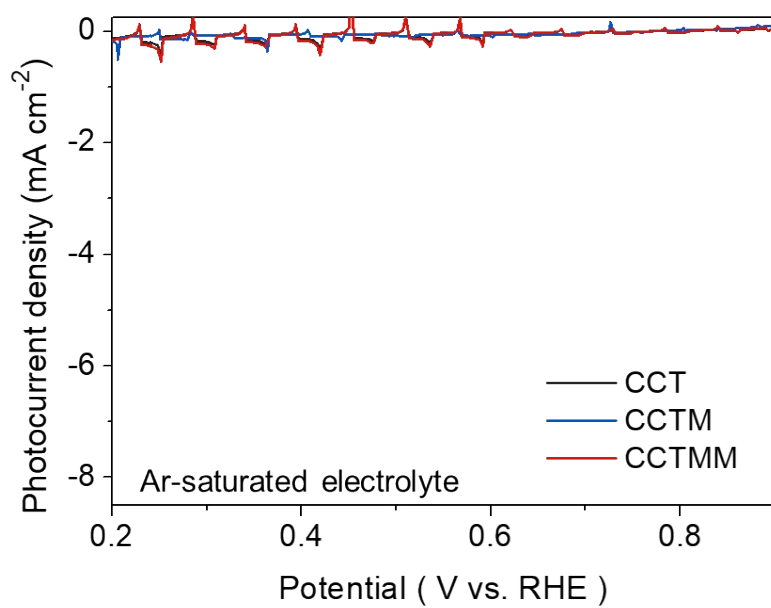

**Fig. S4** LSV measurements for CCT, CCTM, and CCTMM photocathodes under 1-sun solar simulated AM 1.5 G irradiation in an Ar-saturated 0.2 M KOH electrolyte (pH 12).

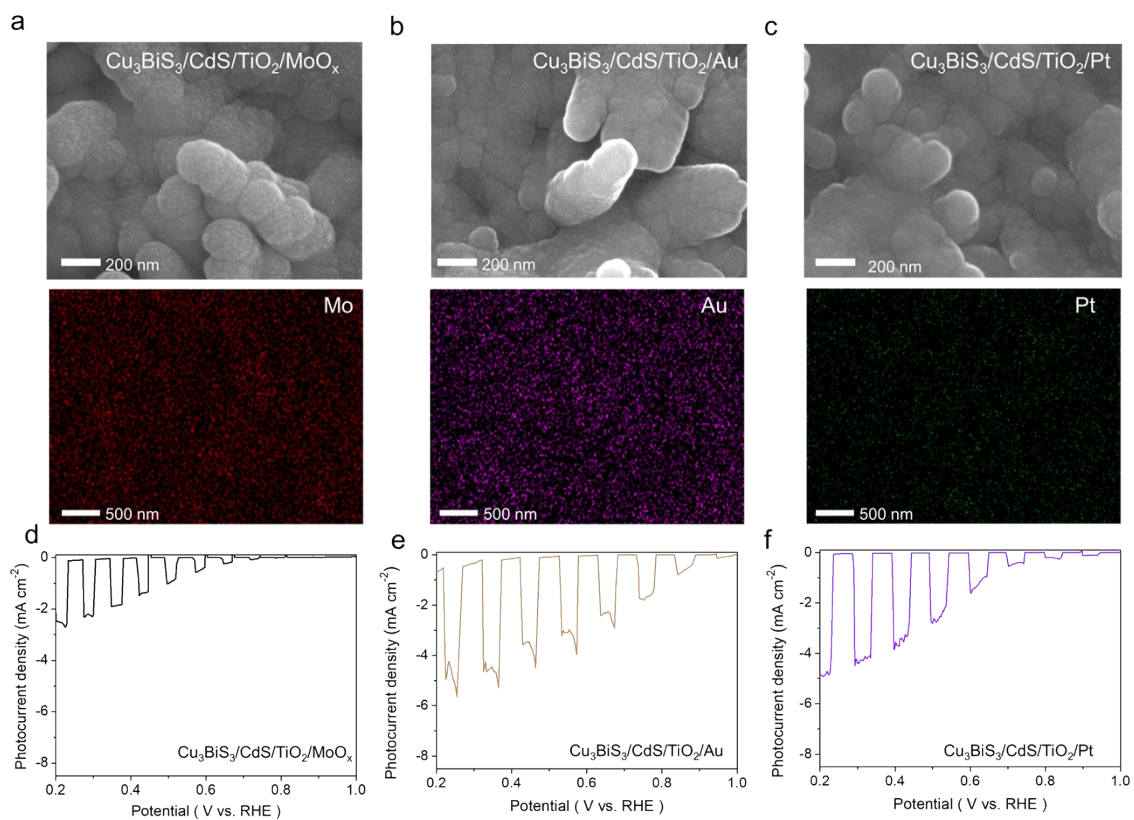

**Fig. S5** SEM images, EDS mapping, and LSV measurements for a,d)  $\text{Cu}_3\text{BiS}_3/\text{CdS}/\text{TiO}_2/\text{MoO}_x$ , b,e)  $\text{Cu}_3\text{BiS}_3/\text{CdS}/\text{TiO}_2/\text{Au}$  and c,f)  $\text{Cu}_3\text{BiS}_3/\text{CdS}/\text{TiO}_2/\text{Pt}$ .

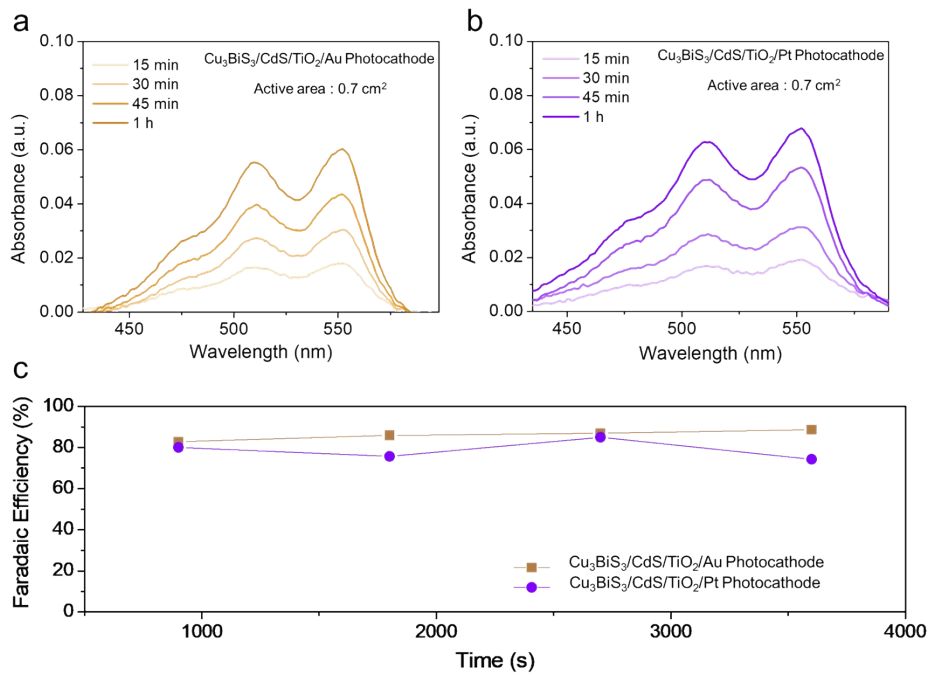

**Fig. S6** Time-dependent absorption spectra of the catholyte aliquot as a function of the reaction duration for a)  $\text{Cu}_3\text{BiS}_3/\text{CdS}/\text{TiO}_2/\text{Au}$  and b)  $\text{Cu}_3\text{BiS}_3/\text{CdS}/\text{TiO}_2/\text{Pt}$  photocathodes. c) Faradaic efficiency of the photocathodes.

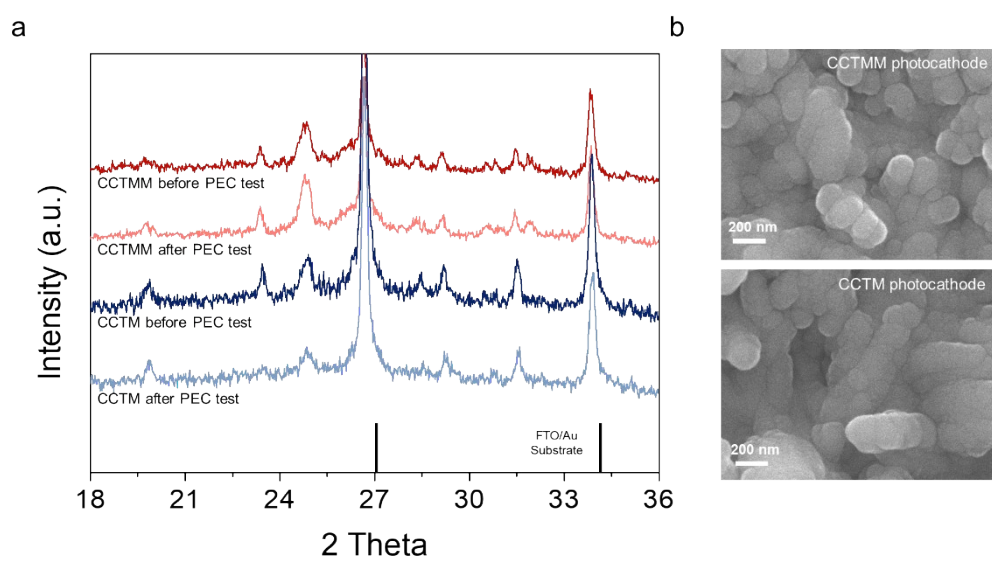

**Fig. S7** a) XRD patterns for CCTM and CCTMM photocathodes of before and after stability test.  
b) Top-view SEM images for CCTM and CCTMM photocathodes of after stability test.



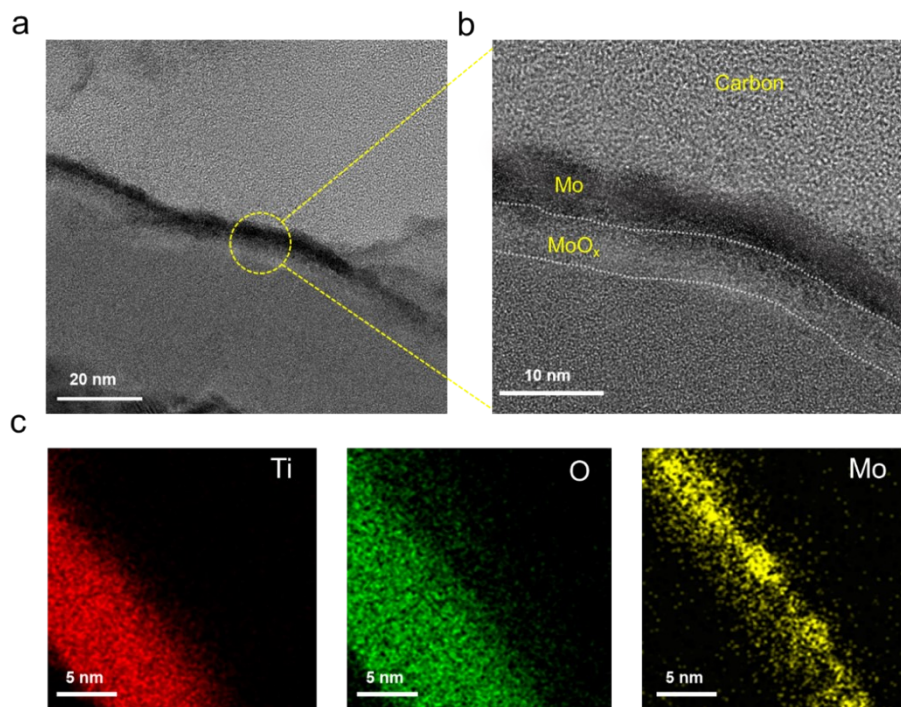

**Fig. S8** a) Cross-sectional TEM image, b) HR-TEM cross-sectional image, and c) EDS mapping of CCTMM photocathode after stability test.

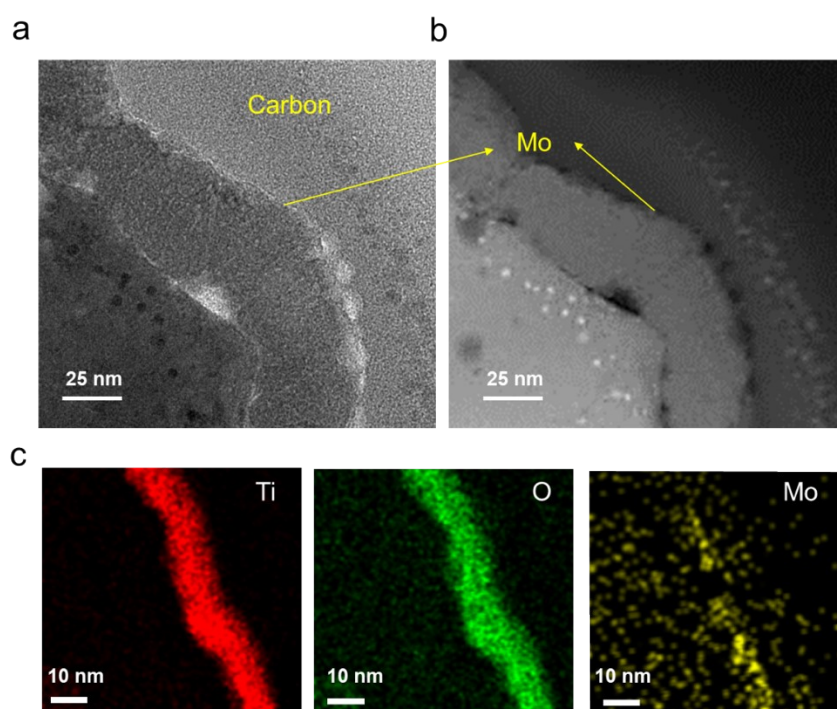

**Fig. S9** a) Bright-field, b) dark-field TEM images, and c) EDS mapping of CCTM photocathode after PEC test.

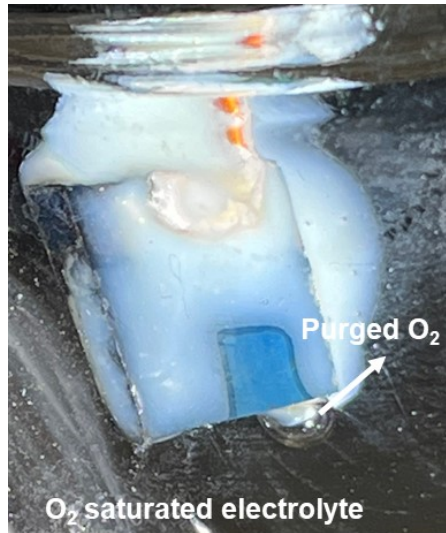

**Fig. S10** Photograph of the CCTMM photocathode being operating in an O<sub>2</sub>-saturated 0.2 M KOH electrolyte.

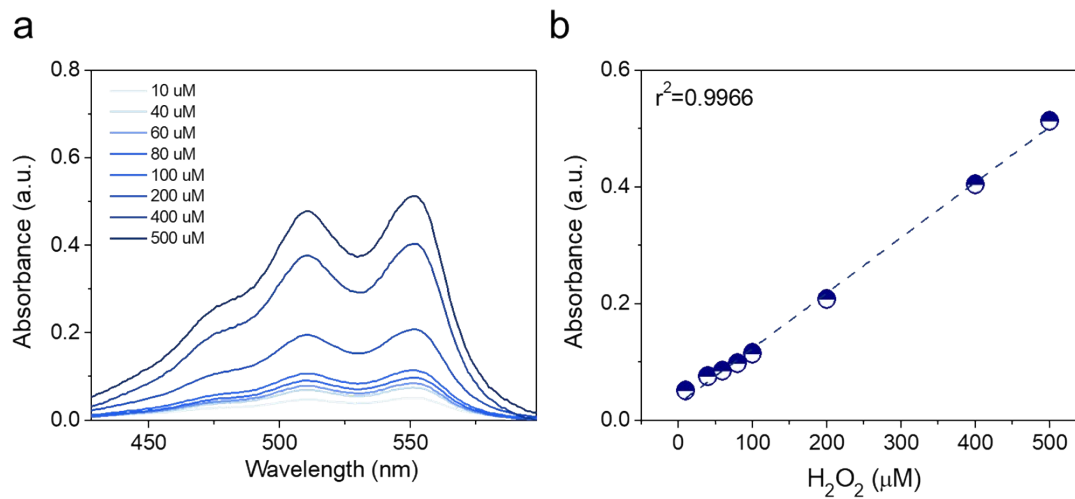

**Fig. S11** a) Absorbance as a function of the added amount of H<sub>2</sub>O<sub>2</sub>. A calibration curve is derived based on the absorbance at 551 nm using the colorimetric method. b) Resulting calibration curve as a function of the H<sub>2</sub>O<sub>2</sub> content.

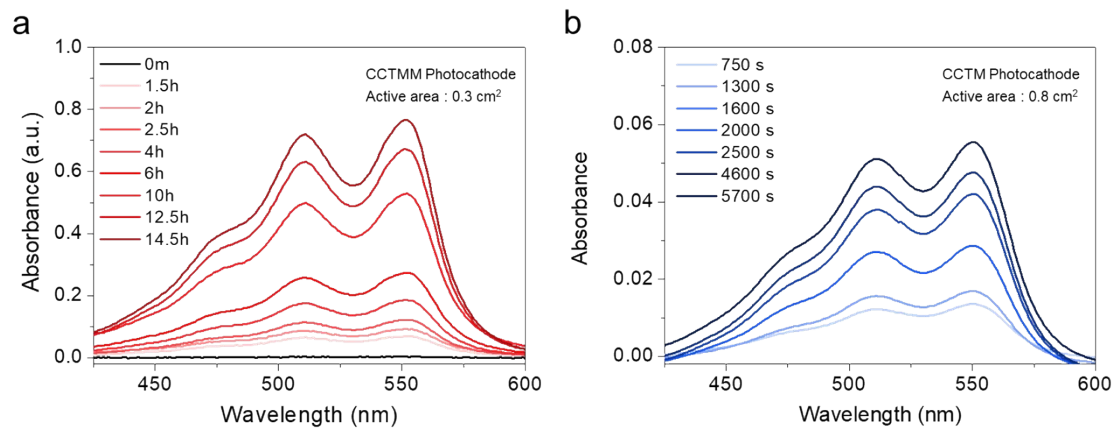

**Fig. S12** Time-dependent absorption spectra of the catholyte aliquot as a function of the reaction duration for the a) CCTMM and b) CCTM photocathodes.

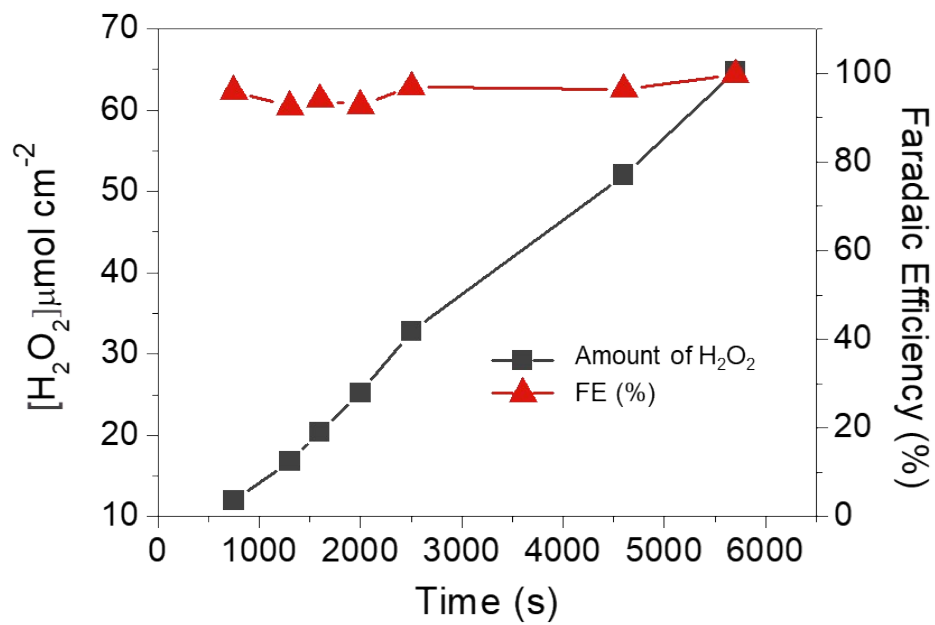

**Fig. S13** Amount of generated H<sub>2</sub>O<sub>2</sub> and Faradaic efficiency (FE) of operating CCTM photocathode.

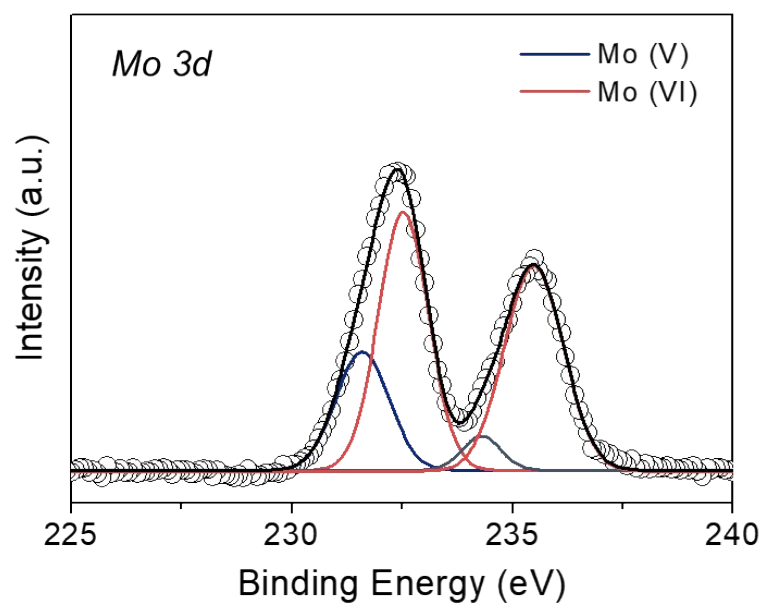

**Fig. S14** XPS spectra for Mo 3d of the MoO<sub>x</sub>.

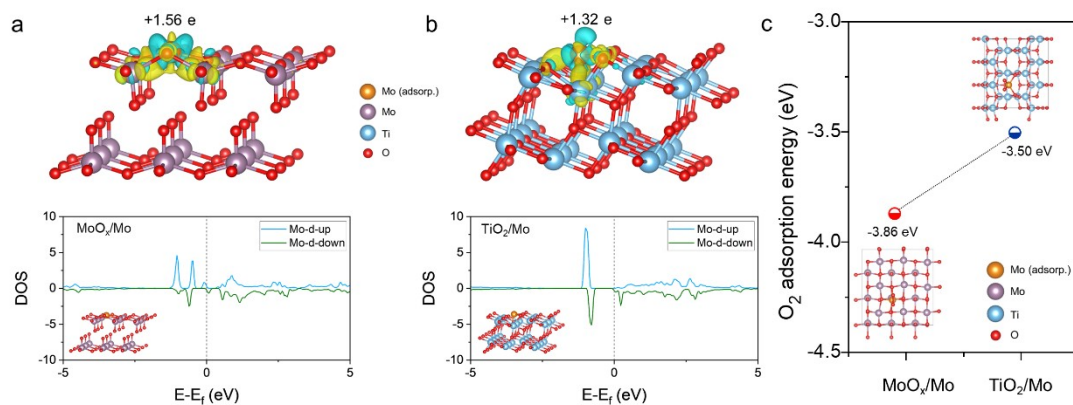

**Fig. S15** Differential charge density, Bader charge analysis, and the partial density of states (PDOS) for Mo d orbital of the a) MoO<sub>x</sub>/Mo and b) TiO<sub>2</sub>/Mo structures. c) Adsorption energies of oxygen adsorbates on the MoO<sub>x</sub>/Mo and TiO<sub>2</sub>/Mo structures.



A. Pathway 1 (ORR for  $\text{H}_2\text{O}_2$  generation)

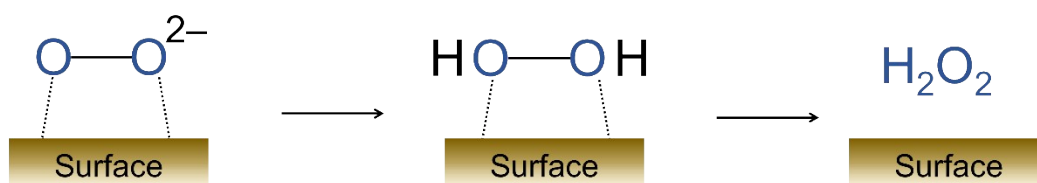

B. Pathway 2 (ORR for  $\text{H}_2\text{O}$  generation)

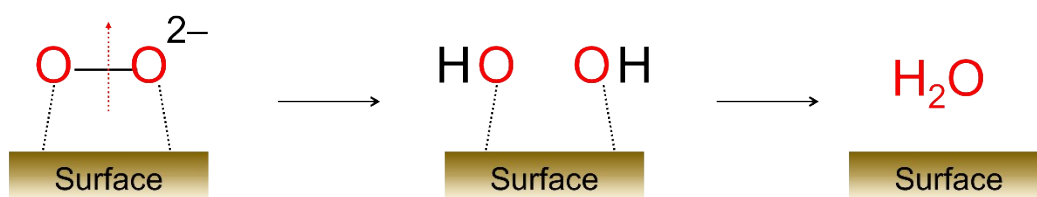

**Fig. S16** Schematic illustrating the mechanisms of  $\text{H}_2\text{O}_2$  production and  $\text{H}_2\text{O}$  generation. Pathway 1 is the case when  $E_d$  is larger than the threshold value of 3.5 eV, resulting in  $\text{O-O}$  preservation. Pathway 2 is when  $E_d$  is smaller than the threshold value of 3.5 eV. Excessive adsorption strength inevitably leads to the undesired production of  $\text{H}_2\text{O}$  instead of  $\text{H}_2\text{O}_2$  by facilitating  $\text{O-O}$  bond cleavage in the oxygen-containing adsorbate.

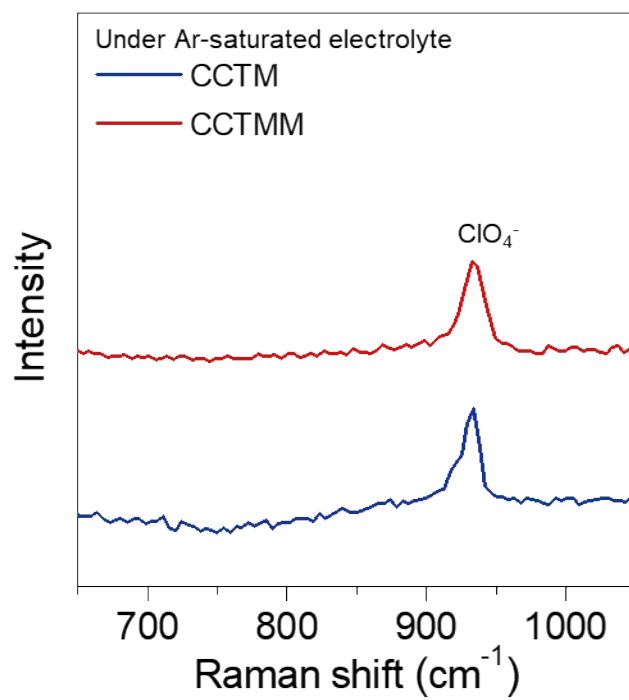

**Fig. S17** *In situ* Raman spectra obtained during ORR over the CCTM and CCTMM photocathodes in Ar-saturated 0.1 M NaClO<sub>4</sub> electrolyte under 1-sun solar simulated AM 1.5 G irradiation at 0.6 V<sub>RHE</sub>.

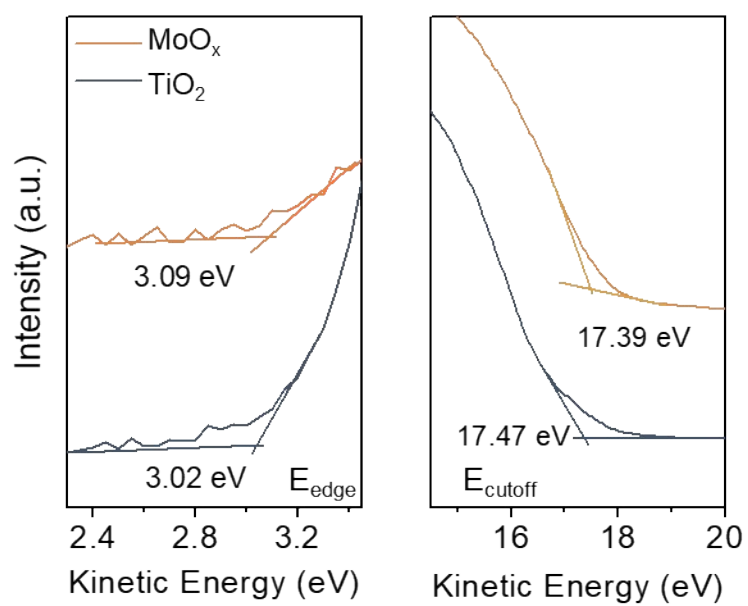

**Fig. S18** Normalized UPS spectra of the valence band edge and secondary electron cutoff region for MoO<sub>x</sub> and TiO<sub>2</sub>.

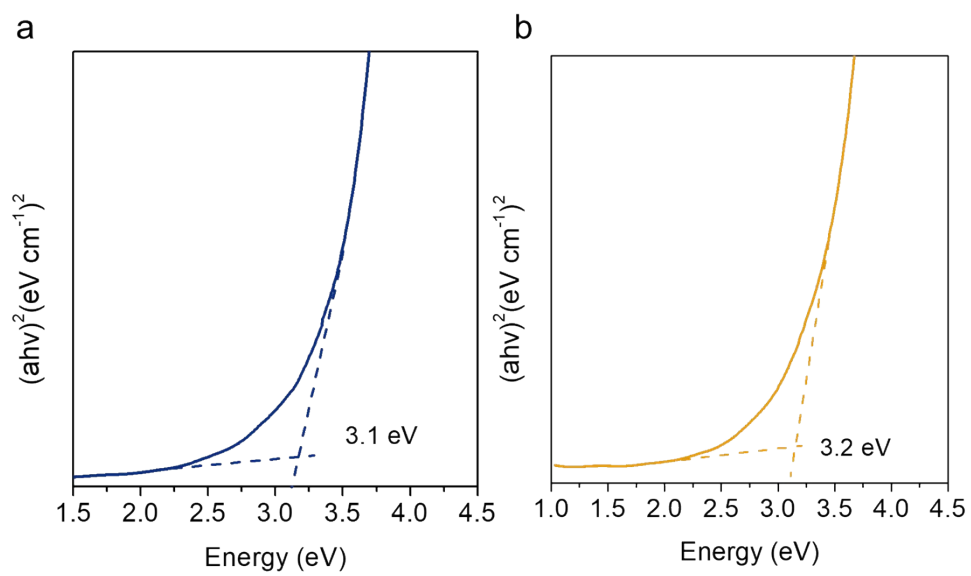

**Fig. S19** Tau plots of a)  $\text{TiO}_2$  and b)  $\text{MoO}_x$  deposited on bare FTO for determining the band gap.

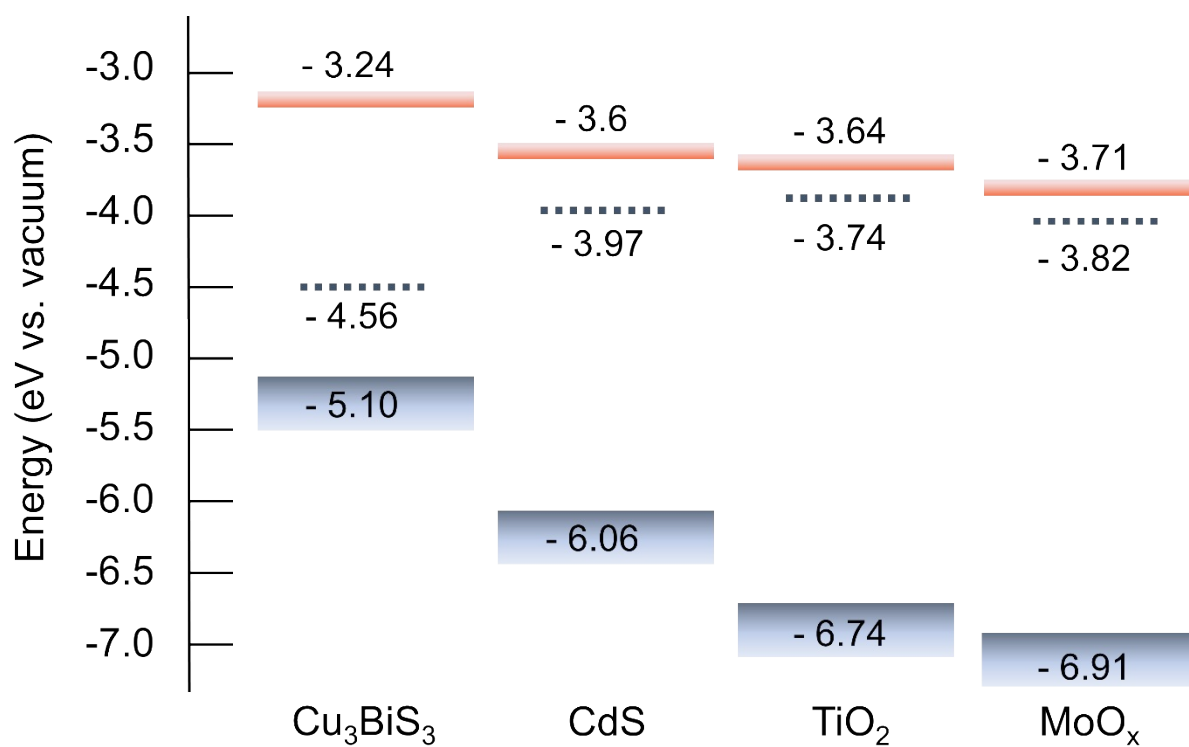

**Fig. S20** Schematic band diagram of  $\text{Cu}_3\text{BiS}_3/\text{CdS}/\text{TiO}_2/\text{MoO}_x$  showing the relative energy positions based on the investigated band gaps of  $\text{TiO}_2$  (3.1 eV) and  $\text{MoO}_x$  (3.2 eV).<sup>S1-2</sup> Band structures of  $\text{Cu}_3\text{BiS}_3$  and  $\text{CdS}$  were obtained from our previous report.<sup>S3</sup>

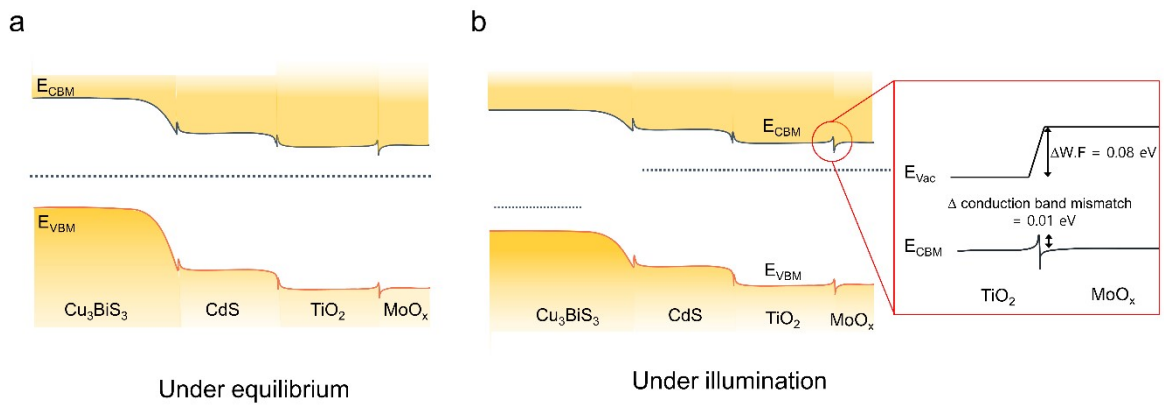

**Fig. S21** Schematic band diagram of  $\text{Cu}_3\text{BiS}_3/\text{CdS}/\text{TiO}_2/\text{MoO}_x$  after junction formation a) under equilibrium and b) under illumination.

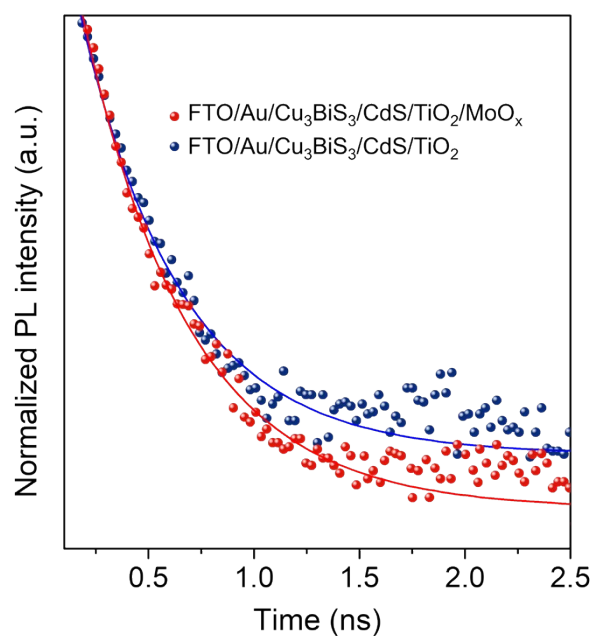

**Fig. S22** TRPL graph for FTO/Au/Cu<sub>3</sub>BiS<sub>3</sub>/CdS/TiO<sub>2</sub> and FTO/Au/Cu<sub>3</sub>BiS<sub>3</sub>/CdS/TiO<sub>2</sub>/MoO<sub>x</sub>.

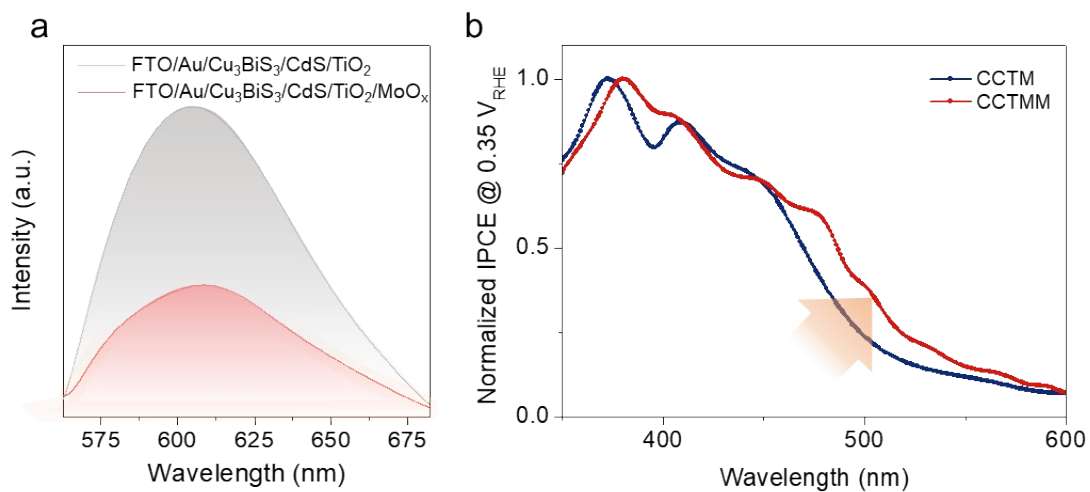

**Fig. S23** a) Steady-state PL spectra for FTO/Au/Cu<sub>3</sub>BiS<sub>3</sub>/CdS/TiO<sub>2</sub> (grey) and after deposition of MoO<sub>x</sub> (red). b) Normalized IPCE spectra for CCTM and CCTMM photocathodes under long wavelength regions (> 450 nm).



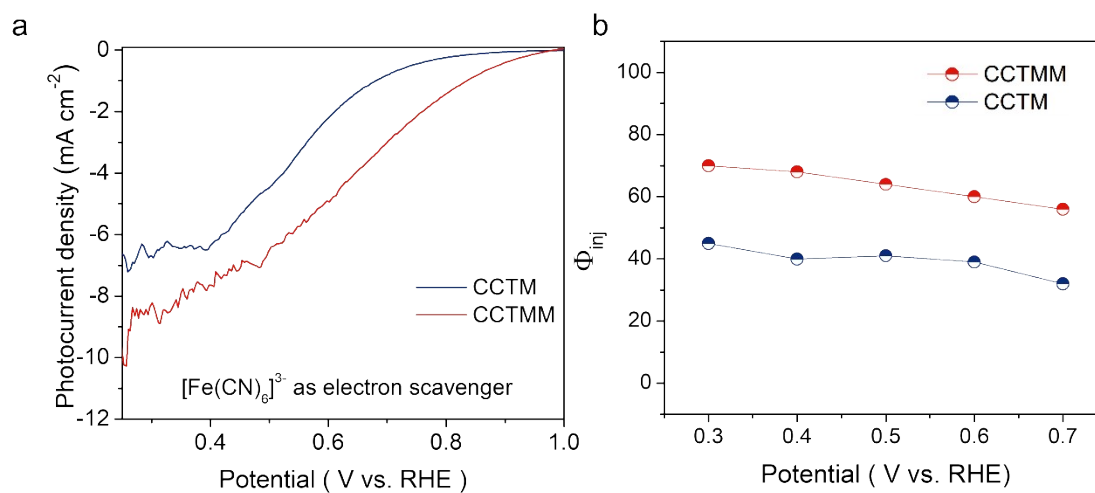

**Fig. S24** a) J-V curves and b) charge injection efficiency of CCTM and CCTMM photocathodes under AM 1.5 G irradiation in 0.2 M KOH electrolyte with 0.05 M  $\text{K}_3[\text{Fe}(\text{CN})_6]$  as an electron scavenger.

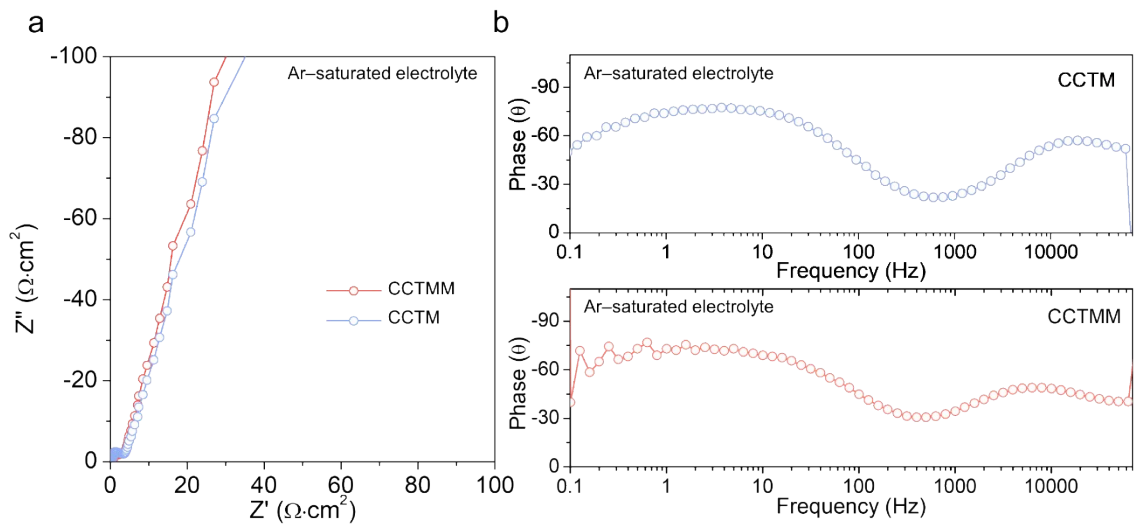

**Fig. S25** a) Nyquist plot and b) Bode plot obtained from EIS measurements for CCTM and CCTMM photocathodes under 1-sun solar simulated AM 1.5 G irradiation in Ar-saturated 0.2 M KOH electrolyte.

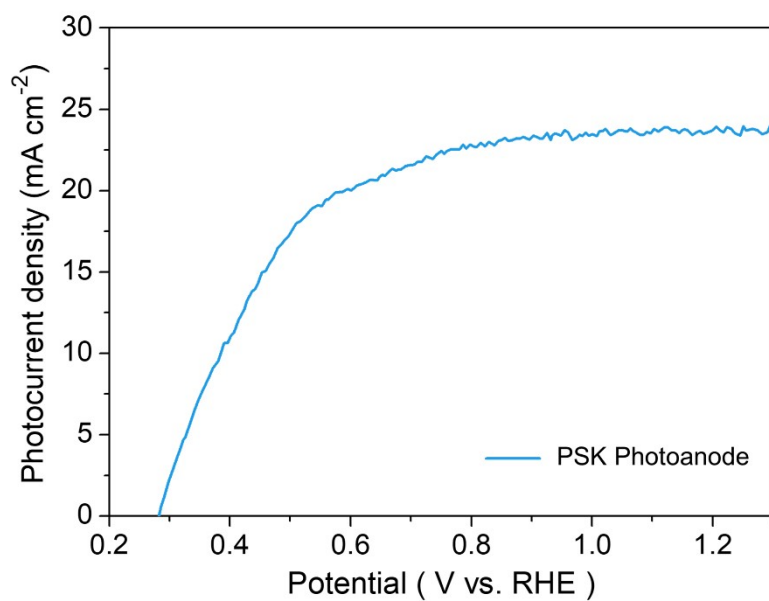

**Fig. S26** LSV measurement for the PSK photoanode under 1-sun solar simulated AM 1.5 G irradiation in 0.2 M KOH electrolyte (pH 12).

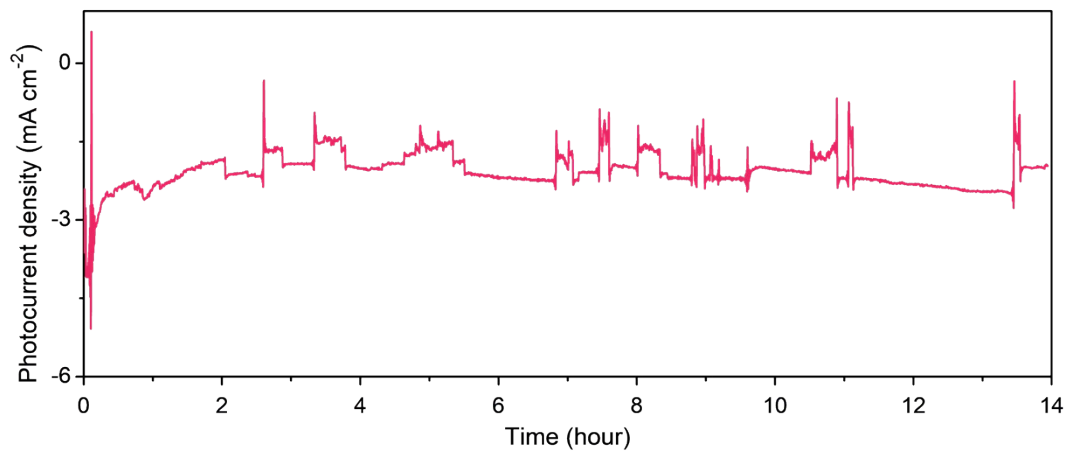

**Fig. S27** Photocurrent density versus time curve for the unbiased CCTMM photocathode-PSK based photoanode coplanar configuration under 1-sun solar simulated AM 1.5 G irradiation.

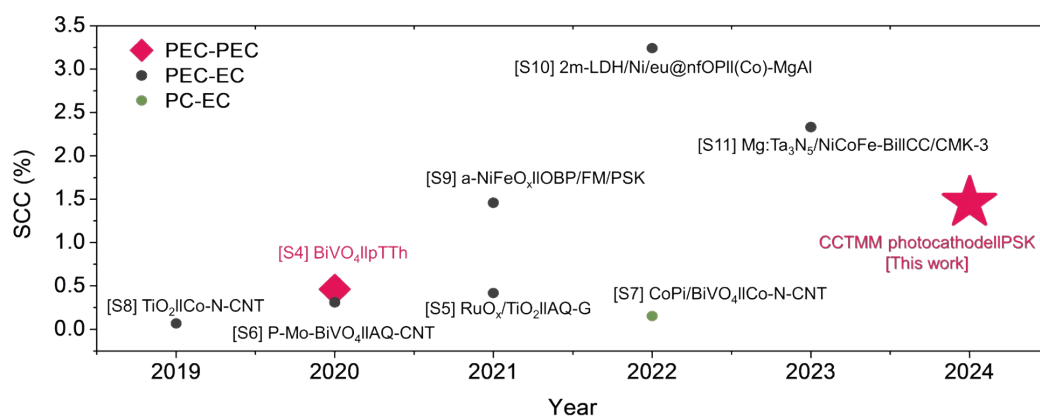

**Fig. S28** Summary of SCC efficiency for bias-free photoelectrochemical H<sub>2</sub>O<sub>2</sub> production cells without any assistant agent such as HCO<sub>3</sub><sup>-</sup>.<sup>S4-S11</sup>

**Table S1.** Inductively coupled plasma (ICP) analysis result for the dissolved Mo concentration in the electrolyte during the device operation.

| Sample | Concentration (ppb) | Relative standard deviation (%) |
|--------|---------------------|---------------------------------|
| CCTM   | 30.005              | 0.7                             |
| CCTMM  | 7.035               | 1.30                            |

**Table S2.** Non-radiative lifetime ( $\tau_1$ ) and radiative lifetime ( $\tau_2$ ) of the FTO/Au/Cu<sub>3</sub>BiS<sub>3</sub>/CdS/TiO<sub>2</sub> and FTO/Au/Cu<sub>3</sub>BiS<sub>3</sub>/CdS/TiO<sub>2</sub>/MoO<sub>x</sub>.

|                                                                                 | $\tau_1$ (ns) | $\tau_2$ (ns) |
|---------------------------------------------------------------------------------|---------------|---------------|
| FTO/Au/Cu <sub>3</sub> BiS <sub>3</sub> /CdS/TiO <sub>2</sub>                   | 0.55          | 1.1           |
| FTO/Au/Cu <sub>3</sub> BiS <sub>3</sub> /CdS/TiO <sub>2</sub> /MoO <sub>x</sub> | 0.49          | 0.61          |

**Table S3.** Area-specific resistance values and CPEs obtained by deconvolving the EIS spectra at 0.35 V<sub>RHE</sub>.

| sample | R <sub>s</sub><br>(Ω) | R <sub>HF</sub><br>(Ω cm <sup>2</sup> ) | CPE <sub>HF</sub><br>(F S <sup>n-1</sup> cm <sup>2</sup> ) | R <sub>LF</sub><br>(Ω cm <sup>2</sup> ) | CPE <sub>LF</sub><br>(F S <sup>n-1</sup> cm <sup>2</sup> ) |
|--------|-----------------------|-----------------------------------------|------------------------------------------------------------|-----------------------------------------|------------------------------------------------------------|
| CCTM   | 1.9                   | 5.42                                    | 5.045 × 10 <sup>-6</sup><br>(n=0.881)                      | 28                                      | 7.5 × 10 <sup>-5</sup><br>(n=0.933)                        |
| CCTMM  | 2.755                 | 5.06                                    | 1.777 × 10 <sup>-5</sup><br>(n=0.811)                      | 9.7                                     | 1.1 × 10 <sup>-4</sup><br>(n=0.895)                        |



## Supplementary Information References

- S1. M. Hannula, H. Ali- Ali-Löytty, K. Lahtonen, E. Sarlin, J. Saari, M. Valden, *Chem. Mater.* 2018, **30**, 1199.
- S2. D. J. Borah, A. T. T. Mostako, P. K. Saikia, P. Dutta, *Mater. Sci. Semicond. Process.* 2019, **93**, 111.
- S3. S. Moon, J. Park, H. Lee, J. W. Yang, J. Yun, Y. S. Park, J. Lee, H. Im, H. W. Jang, W. Yang, J. Moon, *Adv. Sci.*, 2023, **10**, e2206286.
- S4. W. J. Fan, B. Q. Zhang, X. Y. Wang, W. G. Ma, D. Li, Z. L. Wang, M. Dupuis, J. Y. Shi, S. J. Liao, C. Li, *Energy. Environ. Sci.*, 2020, **13**, 238.
- S5. T. H. Jeon, B. Kim, C. Kim, C. Xia, H. T. Wang, P. J. J. Alvarez, W. Choi, *Energy. Environ. Sci.*, 2021, **14**, 3110.
- S6. T. H. Jeon, H. Kim, H.-i. Kim, W. Choi, *Energy. Environ. Sci.*, 2020, **13**, 1730.
- S7. M. Ko, Y. Kim, J. Woo, B. Lee, R. Mehrotra, P. Sharma, J. Kim, S. W. Hwang, H. Y. Jeong, H. Lim, S. H. Joo, J. W. Jang, J. H. Kwak, *Nat. Catal.*, 2022, **5**, 37.
- S8. M. Ko, L. T. M. Pham, Y. J. Sa, J. Woo, T. V. T. Nguyen, J. H. Kim, D. Oh, P. Sharma, J. Ryu, T. J. Shin, S. H. Joo, Y. H. Kim, J. W. Jang, *Nat. Commun.*, 2019, **10**, 5123.
- S9. R. Mehrotra, D. Oh, J. W. Jang, *Nat. Commun.*, 2021, **12**, 6644.
- S10. J. Song, J. M. Yu, J. H. Ahn, H. Cho, J. Oh, Y. S. Kim, J. Kim, M. Ko, S. H. Lee, T. J. Shin, H. Y. Jeong, C. Yang, J. H. Lee, J. W. Jang, S. Cho, *Adv. Funct. Mater.*, 2022, **32**, 2110412.
- S11. D. Zhu, C. Feng, Z. Y. Fan, B. B. Zhang, X. Luo, Y. B. Li, *Sustain. Energ. Fuels*, 2023, **7**, 3326.
